# Supplementary material
Source: Springer Nature journal article supplement (https://www.springerprofessional.de/resource/supplementary/13673_2011_15_MOESM9_ESM.pdf/11899340)
Supplement: MOESM9 [file 11899340]

**Algorithm:** Radix-tree Mining**Input:** Radix-tree R, ItemList IL, ItemMap IM, minsup**Output:** Frequent Itemsets L

// Definition of variables

// X: Itemset represented by an array of items

// h: current index in X

//  $\ell$ : current index in L1)  $X \leftarrow 0$ ;2)  $L \leftarrow 0$ ;3)  $\ell \leftarrow 0$ ;  $h \leftarrow 0$ ;4) while(  $I < |IL|$  ) {5)   if (  $IL[\ell].counter < minsup$  )6)      $\ell \leftarrow \ell + 1$ ;

7)   else

8)     if(  $h > 0 \ \&\& \ \ell = X[h-1]$  ) {9)          $\ell \leftarrow \ell + 1$ ;10)         $h \leftarrow h - 1$ ; }

11)     else {

12)          $X[h] \leftarrow \ell$ ;13)          $h \leftarrow h + 1$ ;14)          $L \leftarrow X$ ;15)         Adjusts  $IL[j].counter$  and  $IL[j].ptr$  for  $j < \ell$ ;16)          $\ell \leftarrow 0$ ; }

17) }
